# Supplementary material
Source: ML conference proceedings conference paper supplement (https://openaccess.thecvf.com/content/CVPR_2019/html/Gao_FilterReg_Robust_and_CVPR_2019_paper.html)
Supplement: Supplementary file 3 [file Gao_FilterReg_Robust_and_CVPR_2019_supplemental.zip]

Archive with 5 entries (4 files):
- filterreg-supp.pdf
- __MACOSX/
- __MACOSX/._filterreg-supp.pdf
- filterreg-video.mp4
- __MACOSX/._filterreg-video.mp4
